# Supplementary material
Source: MDPI journal article supplement (https://www.mdpi.com/2073-4441/16/10/1399)
Supplement: s1 [file s1]

## Supplementary information

### **Wastewater treatment plants performance for reuse: evaluation for bacterial and viral risks**

*Ileana Federigi\**, *Roberto Salvadori\*\**, *Giulia Lauretani\**, *Anna Leone\*\**, *Simone Lippi\*\**, *Francesca Marvulli\*\**, *Alessandra Pagani\**, *Marco Verani\**, *Annalaura Carducci\**

*\* Laboratory of Hygiene and Environmental Virology, Department of Biology, University of Pisa, Via S. Zeno 35/39, 56127 Pisa, Italy*

*\*\* Acque S.p.A., Via A. Bellatalla 1, 56121 Pisa, Italy*

#### **List of Tables**

|                                                                                                                                                                                                                                                                                      |   |
|--------------------------------------------------------------------------------------------------------------------------------------------------------------------------------------------------------------------------------------------------------------------------------------|---|
| <b>Table S1.</b> Oligonucleotide primers and probes used for the viral detection by (RT)qPCR. Target regions are also reported for each viral parameter.....                                                                                                                         | 2 |
| <b>Table S2.</b> Effect of two independent variables, water treatment and weather condition, on <i>E. coli</i> levels in the exit samples (dependent variable), separately for each WWTP. <i>E. coli</i> concentrations are reported as geometric mean $\pm$ standard deviation..... | 3 |
| <b>Table S3.</b> Bacterial and viral indicator concentrations at different stages of the treatment process. Results are reported as median and interquartile range (first and third quartiles) and refer to eight sampling dates.....                                                | 3 |

#### **List of Figures**

|                                                                                                                                                                                                                                                                                                                                                                                                                                                                                                                                                                              |   |
|------------------------------------------------------------------------------------------------------------------------------------------------------------------------------------------------------------------------------------------------------------------------------------------------------------------------------------------------------------------------------------------------------------------------------------------------------------------------------------------------------------------------------------------------------------------------------|---|
| <b>Figure S1.</b> Compliance of WWTP2 with EU minimum requirements for BOD <sub>5</sub> , TSS and <i>E. coli</i> (data of <i>E. coli</i> have been Log <sub>10</sub> -transformed). Information on rainfall and chlorination are also reported for the entire monitoring period in the bottom box. Precipitation corresponds to accumulated rainfall (mm) in the 24 prior to the sampling dates, according to Copernicus definition of wet days ( <a href="https://climate.copernicus.eu/ESOTC">https://climate.copernicus.eu/ESOTC</a> ; accessed on 12 January 2024) ..... | 4 |
| <b>Figure S2.</b> Compliance of WWTP2 with EU minimum requirements for BOD <sub>5</sub> , TSS and <i>E. coli</i> (data of <i>E. coli</i> have been Log <sub>10</sub> -transformed). Information on rainfall and chlorination are also reported for the entire monitoring period in the bottom box. Precipitation corresponds to accumulated rainfall (mm) in the 24 prior to the sampling dates, according to Copernicus definition of wet days ( <a href="https://climate.copernicus.eu/ESOTC">https://climate.copernicus.eu/ESOTC</a> ; accessed on 12 January 2024).....  | 5 |

**Table S1.** Oligonucleotide primers and probes used for the viral detection by (RT)qPCR. Target regions are also reported for each viral parameter. References are reported in the footnotes.

| Primer or probe names                 | Concentration (μM) | Sequence (5'-3')                          | Thermal cycle                                                              | Reference              |
|---------------------------------------|--------------------|-------------------------------------------|----------------------------------------------------------------------------|------------------------|
| Human adenovirus (hexon gene)         |                    |                                           |                                                                            |                        |
| Primer AdF                            | 0.9                | CWTACATGCACATCKCSG G                      | 50°C: 2 min,<br>95°C: 10 min,<br>45 cycles<br>(95°C: 15s;<br>60°C: 1 min)  | Hernroth et al., 2002  |
| Primer AdR                            | 0.9                | CRCGGGCRAAYTGCACCA G                      |                                                                            |                        |
| Probe AdP                             | 0.225              | FAM-CCGGGCTCAGGTACTCCGA<br>GGCGTCCT-TAMRA |                                                                            |                        |
| Norovirus genogroup II (RdR Pol gene) |                    |                                           |                                                                            |                        |
| Primer JJV2F                          | 1                  | CAAGAGTCAATGTTTAGGTGGATGAG                | 48°C: 30 min,<br>95°C: 10 min,<br>45 cycles<br>(95°C: 15s;<br>60°C: 1 min) | Skraber et al., 2009   |
| Primer COG2R                          | 1                  | TCGACGCCATCTTCATTCACA                     |                                                                            |                        |
| Probe RING2-TP                        | 0.1                | FAM-TGGGAGGGCGATCGCAA<br>TCT-BHQ          |                                                                            |                        |
| Enterovirus (5' UTR region)           |                    |                                           |                                                                            |                        |
| Primer EVF                            | 0.6                | GGCCCCTGAATGCGGCTAAT                      | 48°C: 30 min,<br>95°C: 10 min,<br>45 cycles<br>(95°C: 15s;<br>60°C: 1 min) | Donaldson et al., 2002 |
| Primer EVR                            | 0.6                | CACCGGATGGCCAATCCAA                       |                                                                            |                        |
| Probe EV                              | 0.25               | FAM-CGGACACCCAAAGTAGT<br>CGGTTCCG-TAMRA   |                                                                            |                        |
| SARS-CoV-2 (ORF1ab)                   |                    |                                           |                                                                            |                        |
| 2297-CoV-2-F                          | 0.5                | ACA TGG CTT TGA GTT GAC ATC T             | 50°C: 30 min,<br>95 °C: 5 min,<br>45 cycles (95 °C: 15s; 60°C: 30s)        | La Rosa et al., 2021   |
| 2298-CoV-2-R                          | 0.9                | AGC AGT GGA AAA GCA TGT GG                |                                                                            |                        |
| 2299-CoV-2-P                          | 0.25               | FAM-CAT AGA CAA CAG GTG CGC<br>TC-MGBEQ   |                                                                            |                        |

Hernroth et al. (2022) Environmental factors influencing human viral pathogens and their potential indicator organisms in the blue mussel, *Mytilus edulis*: the first Scandinavian report. doi: 10.1128/AEM.68.9.4523-4533.2002; Skrabber et al. (2009) Occurrence and persistence of enteroviruses, noroviruses and F-specific RNA phages in natural wastewater biofilms. doi: 10.1016/j.watres.2009.05.020; Donaldson et al. (2002) Detection, quantitation and identification of enteroviruses from surface waters and sponge tissue from the Florida Keys using real-time RT-PCR. doi: 10.1016/s0043-1354(01)00479-1; La Rosa et al. (2021) SARS-CoV-2 has been circulating in northern Italy since december 2019: evidence from environmental monitoring. doi: 10.1016/j.scitotenv.2020.141711

**Table S2.** Effect of two independent variables, water treatment and weather condition, on *E. coli* levels in the exit samples (dependent variable), separately for each WWTP. *E. coli* concentrations are reported as geometric mean  $\pm$  standard deviation

| Weather condition | Water treatment | n° obs | <i>E. coli</i> levels Log <sub>10</sub> (MPN/100ml) | 2-way ANOVA (p-value)                                            |
|-------------------|-----------------|--------|-----------------------------------------------------|------------------------------------------------------------------|
| <b>WWTP1</b>      |                 |        |                                                     |                                                                  |
| Dry               | Chlorinated     | 52     | 3.8 $\pm$ 0.9                                       | < <b>0.0001</b> weather condition; < <b>0.01</b> water treatment |
|                   | Not chlorinated | 9      | 4.5 $\pm$ 0.6                                       |                                                                  |
| Wet               | Chlorinated     | 14     | 4.4 $\pm$ 0.5                                       |                                                                  |
|                   | Not chlorinated | 2      | 5.2 $\pm$ 0.1                                       |                                                                  |
| <b>WWTP2</b>      |                 |        |                                                     |                                                                  |
| Dry               | Chlorinated     | 51     | 1.3 $\pm$ 1.2                                       | < <b>0.01</b> weather condition; < <b>0.0001</b> water treatment |
|                   | Not chlorinated | 55     | 4.19 $\pm$ 0.9                                      |                                                                  |
| Wet               | Chlorinated     | 5      | 1.8 $\pm$ 1.5                                       |                                                                  |
|                   | Not chlorinated | 12     | 4.46 $\pm$ 0.6                                      |                                                                  |

**Table S3.** Bacterial and viral indicator concentrations at different stages of the treatment process. Results are reported as median and interquartile range (first and third quartiles) and refer to eight sampling dates.

| Microbial parameter            | WWTP type | Sewage entrance                                               | Secondary effluents                                           | Tertiary effluents                                            |
|--------------------------------|-----------|---------------------------------------------------------------|---------------------------------------------------------------|---------------------------------------------------------------|
| <i>E. coli</i> (MPN/L)         | WWTP1     | 6.68 $\times 10^7$ (5.47 $\times 10^7$ - 6.87 $\times 10^7$ ) | 1.62 $\times 10^5$ (9.55 $\times 10^4$ - 2.02 $\times 10^5$ ) | 2.44 $\times 10^4$ (9.45 $\times 10^3$ - 2.30 $\times 10^5$ ) |
|                                | WWTP2     | 1.43 $\times 10^8$ (1.12 $\times 10^8$ - 1.73 $\times 10^8$ ) | 1.80 $\times 10^5$ (9.35 $\times 10^4$ - 1.05 $\times 10^6$ ) | 2.14 $\times 10^4$ (8.65 $\times 10^3$ - 1.17 $\times 10^5$ ) |
| Intestinal enterococci (MPN/L) | WWTP1     | 1.16 $\times 10^7$ (8.17 $\times 10^6$ - 1.31 $\times 10^7$ ) | 3.22 $\times 10^4$ (1.48 $\times 10^4$ - 3.99 $\times 10^4$ ) | 3.65 $\times 10^3$ (2.03 $\times 10^3$ - 1.72 $\times 10^4$ ) |
|                                | WWTP2     | 1.53 $\times 10^7$ (1.38 $\times 10^7$ - 1.77 $\times 10^7$ ) | 4.81 $\times 10^4$ (2.25 $\times 10^4$ - 7.07 $\times 10^4$ ) | 6.65 $\times 10^3$ (8.00 $\times 10^2$ - 2.92 $\times 10^4$ ) |
| Somatic coliphages (PFU/L)     | WWTP1     | 9.00 $\times 10^6$ (5.37 $\times 10^6$ - 1.60 $\times 10^7$ ) | 2.95 $\times 10^4$ (1.93 $\times 10^4$ - 6.80 $\times 10^4$ ) | 4.90 $\times 10^3$ (2.15 $\times 10^3$ - 1.62 $\times 10^4$ ) |
|                                | WWTP2     | 1.05 $\times 10^7$ (7.00 $\times 10^6$ - 1.35 $\times 10^7$ ) | 6.50 $\times 10^4$ (3.38 $\times 10^4$ - 9.60 $\times 10^4$ ) | 4.90 $\times 10^3$ (2.20 $\times 10^3$ - 5.35 $\times 10^4$ ) |
| Clostridia spores (CFU/L)      | WWTP1     | 1.10 $\times 10^5$ (7.00 $\times 10^4$ - 1.80 $\times 10^5$ ) | 3.50 $\times 10^2$ (2.30 $\times 10^2$ - 9.20 $\times 10^2$ ) | 5.50 $\times 10^1$ (4.75 $\times 10^1$ - 9.00 $\times 10^1$ ) |
|                                | WWTP2     | 9.25 $\times 10^4$ (4.55 $\times 10^4$ - 1.24 $\times 10^5$ ) | 9.00 $\times 10^3$ (6.25 $\times 10^3$ - 1.35 $\times 10^4$ ) | 3.50 $\times 10^3$ (2.75 $\times 10^3$ - 7.00 $\times 10^3$ ) |

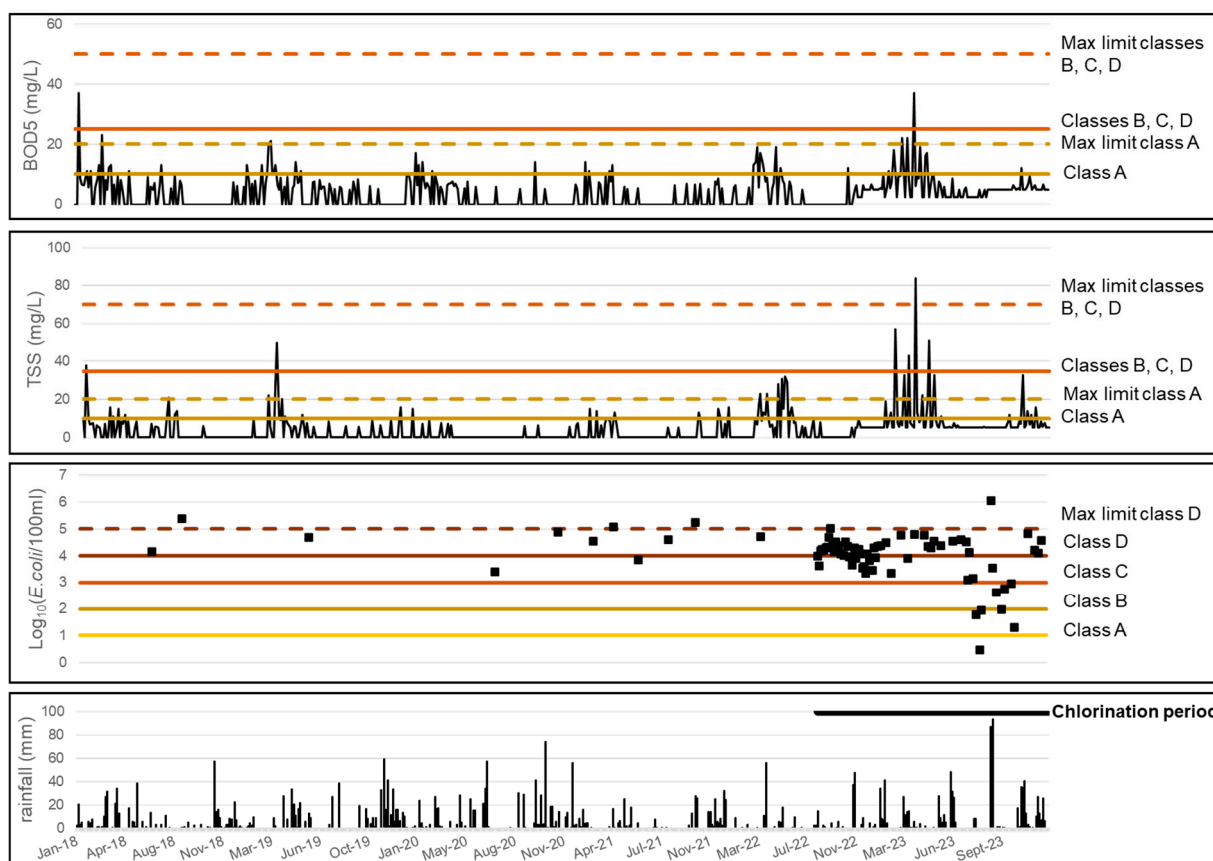

**Figure S1.** Compliance of WWTP1 with EU minimum requirements for BOD<sub>5</sub>, TSS and *E. coli* (data of *E. coli* have been Log<sub>10</sub>-transformed). Information on rainfall and chlorination are also reported for the entire monitoring period in bottom box. Precipitation corresponds to accumulated rainfall (mm) in the 24 prior to the sampling dates, according to Copernicus definition of wet days (<https://climate.copernicus.eu/ESOTC>; accessed on 12 January 2024).

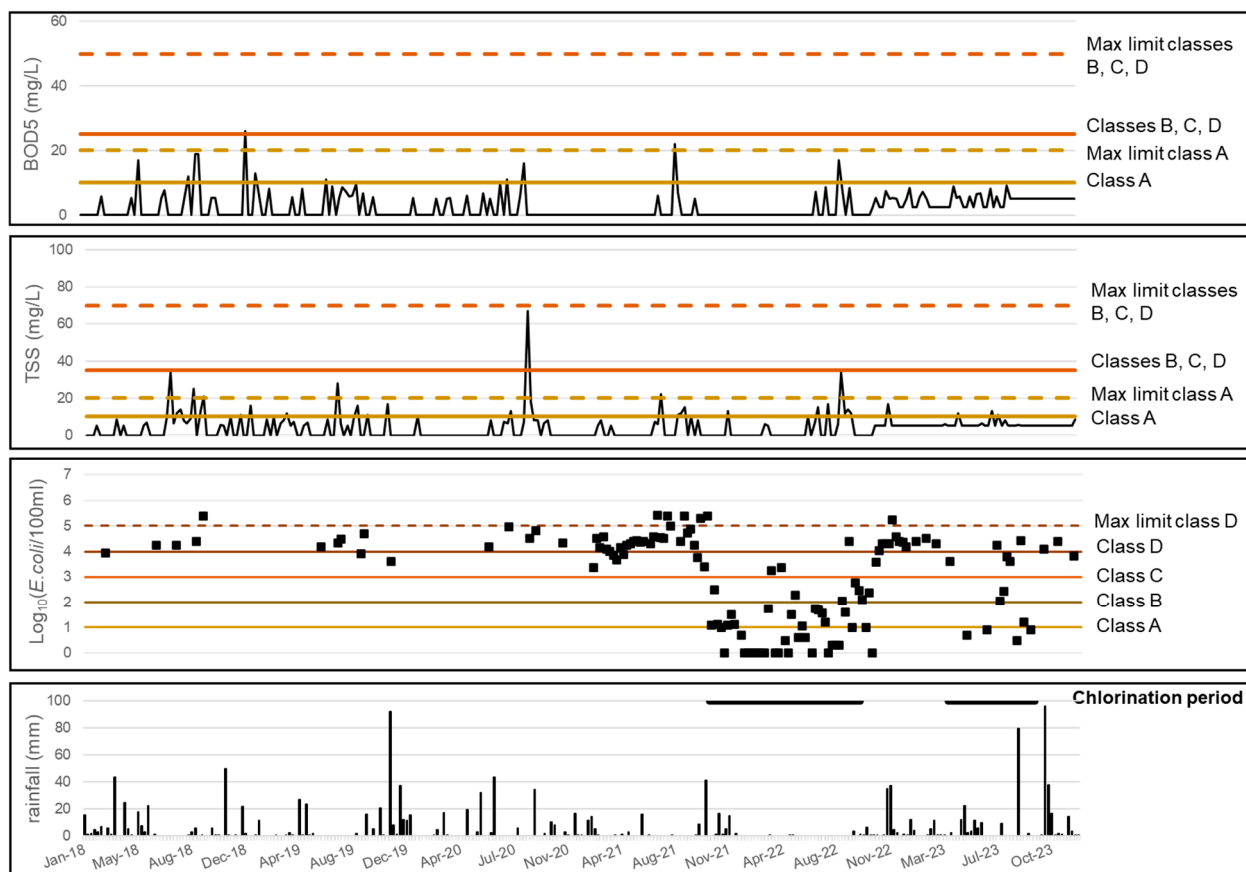

**Figure S2.** Compliance of WWTP2 with EU minimum requirements for BOD<sub>5</sub>, TSS and *E. coli* (data of *E. coli* have been Log<sub>10</sub>-transformed). Information on rainfall and chlorination are also reported for the entire monitoring period in the bottom box. Precipitation corresponds to accumulated rainfall (mm) in the 24 prior to the sampling dates, according to Copernicus definition of wet days (<https://climate.copernicus.eu/ESOTC>; accessed on 12 January 2024).
